# Supplementary material for: First Detection and Molecular Characterization of Novel Variant Infectious Bursal Disease Virus (Genotype A2dB1b) in Egypt
Source: MDPI journal article supplement (doi:10.3390/v15122388), 2023-12-07
Supplement: s1 [file s1]

**Supplementary Table S1.** Comparison of the VP2 amino acid sequences of the detected A2dB1b strains (marked with solid squares, ■) with relevant novel variant IBDVs. All sites featuring at least one substitution (highlighted in orange) are shown.

|                         |             | VP2 |    |    |    |    |    |     |     |     |     |     |     |     |     |     |     |     |     |     |
|-------------------------|-------------|-----|----|----|----|----|----|-----|-----|-----|-----|-----|-----|-----|-----|-----|-----|-----|-----|-----|
| Strain                  | Country     | 15  | 73 | 76 | 77 | 79 | 97 | 146 | 170 | 187 | 220 | 251 | 277 | 299 | 321 | 336 | 343 | 359 | 405 | 409 |
| ■ 1/chicken/EGY/H792/23 | Egypt       | I   | T  | S  | D  | N  | K  | S   | P   | I   | Y   | S   | A   | S   | V   | T   | P   | K   | R   | G   |
| ■ 1/chicken/EGY/H793/23 | Egypt       | I   | T  | S  | D  | N  | K  | S   | P   | I   | Y   | S   | A   | S   | V   | T   | P   | K   | R   | G   |
| ■ 1/chicken/EGY/H798/23 | Egypt       | I   | T  | S  | D  | N  | N  | S   | P   | I   | Y   | S   | A   | S   | V   | T   | P   | K   | R   | A   |
| ■ 1/chicken/EGY/H801/23 | Egypt       | I   | T  | N  | D  | N  | N  | S   | P   | I   | Y   | S   | V   | S   | V   | T   | P   | K   | R   | G   |
| ■ 1/chicken/EGY/H812/23 | Egypt       | M   | T  | N  | D  | N  | N  | S   | P   | I   | Y   | S   | A   | S   | V   | T   | P   | K   | R   | G   |
| IBDV-EGY-CV75-2023      | Egypt       | I   | T  | S  | D  | N  | N  | S   | P   | I   | Y   | S   | A   | S   | V   | T   | P   | K   | R   | G   |
| IBDV-CV98-2023          | Egypt       | I   | T  | S  | D  | N  | N  | S   | P   | I   | Y   | S   | A   | S   | V   | T   | P   | K   | R   | G   |
| IBDV-EGY-F427-2023      | Egypt       | I   | T  | S  | D  | N  | N  | S   | P   | I   | Y   | S   | A   | S   | A   | T   | P   | K   | R   | G   |
| IBDV-EGY-F647-2023      | Egypt       | I   | T  | S  | D  | N  | N  | S   | P   | I   | Y   | S   | A   | S   | V   | T   | P   | K   | R   | G   |
| IBDV-EGY-F649-9-2023    | Egypt       | I   | T  | S  | D  | N  | N  | S   | A   | I   | Y   | S   | A   | S   | A   | T   | P   | K   | R   | G   |
| IBDV-EGY-F658-2023      | Egypt       | I   | T  | S  | D  | N  | N  | S   | P   | I   | Y   | S   | A   | S   | V   | T   | P   | K   | R   | G   |
| IBD/SD/LY/CN/01/2020    | China       | I   | T  | S  | D  | N  | N  | S   | P   | I   | Y   | S   | A   | S   | V   | T   | P   | K   | R   | G   |
| HB202201                | China       | I   | T  | S  | D  | N  | N  | S   | P   | I   | Y   | S   | A   | S   | A   | T   | P   | K   | R   | G   |
| SHG352                  | China       | I   | T  | S  | D  | N  | N  | S   | P   | I   | Y   | S   | A   | S   | A   | T   | P   | K   | R   | G   |
| IBDV-LY21               | China       | I   | T  | S  | D  | N  | N  | F   | P   | I   | Y   | S   | A   | S   | A   | A   | S   | K   | R   | G   |
| FJ2021                  | China       | I   | T  | S  | D  | N  | N  | S   | P   | I   | Y   | S   | A   | S   | A   | T   | P   | K   | R   | G   |
| ZD-2018-1               | China       | I   | T  | S  | D  | N  | N  | S   | P   | I   | Y   | S   | A   | S   | A   | T   | P   | K   | R   | G   |
| LN-2020-2               | China       | I   | T  | S  | N  | N  | N  | S   | P   | I   | Y   | S   | A   | S   | A   | T   | P   | K   | R   | G   |
| 19D69                   | South Korea | I   | T  | S  | D  | S  | N  | S   | P   | I   | Y   | S   | A   | S   | A   | T   | P   | T   | R   | G   |
| 19D51                   | South Korea | I   | T  | S  | N  | S  | N  | S   | P   | I   | Y   | S   | A   | S   | A   | T   | P   | T   | R   | G   |
| IBD16Hen01              | China       | I   | I  | S  | D  | S  | N  | S   | P   | V   | Y   | S   | A   | S   | A   | T   | P   | T   | R   | G   |
| SHG19                   | China       | I   | I  | S  | D  | S  | N  | S   | P   | V   | Y   | S   | A   | S   | A   | T   | P   | T   | R   | G   |
| FJ2019                  | China       | I   | I  | S  | D  | S  | N  | S   | P   | V   | Y   | S   | A   | S   | A   | T   | P   | K   | R   | G   |
| SHG358                  | China       | I   | I  | S  | D  | S  | N  | S   | P   | V   | Y   | S   | A   | S   | A   | T   | P   | T   | R   | G   |
| GD2021-17               | China       | I   | I  | S  | D  | S  | N  | S   | P   | V   | Y   | S   | A   | S   | A   | T   | P   | T   | R   | G   |
| Hb06v                   | China       | I   | I  | S  | D  | S  | N  | S   | P   | V   | Y   | S   | A   | S   | A   | T   | P   | T   | R   | G   |
| GD-1                    | China       | I   | I  | S  | D  | S  | N  | S   | P   | V   | Y   | S   | A   | G   | A   | T   | P   | T   | R   | G   |
| LN-2020-1               | China       | I   | I  | S  | D  | S  | N  | S   | P   | V   | F   | S   | A   | S   | A   | T   | P   | K   | R   | G   |
| FJ-18                   | China       | I   | I  | S  | D  | S  | N  | S   | P   | V   | Y   | S   | A   | S   | A   | T   | P   | K   | R   | G   |
| QZ191002                | China       | I   | I  | S  | D  | S  | N  | S   | P   | V   | Y   | N   | A   | S   | T   | T   | P   | T   | R   | G   |
| UPM1432/2019            | Malaysia    | I   | I  | S  | D  | S  | N  | S   | P   | V   | Y   | S   | A   | S   | A   | T   | P   | T   | R   | G   |
| HB-2020-1               | China       | I   | I  | S  | D  | S  | N  | S   | P   | V   | Y   | S   | A   | S   | T   | T   | P   | T   | R   | G   |
| IBDV-JS19-14701         | China       | I   | I  | S  | D  | S  | N  | S   | P   | V   | Y   | S   | A   | S   | A   | T   | P   | T   | R   | G   |
| FJ-1812                 | China       | I   | I  | S  | D  | S  | N  | S   | P   | V   | Y   | S   | A   | S   | A   | T   | P   | K   | G   | G   |

**Supplementary Table S2.** Comparison of the VP1 amino acid sequences of the detected A2dB1b strains (marked with solid squares, ■) with relevant novel variant IBDVs. All sites featuring at least one substitution (highlighted in orange) are shown.

|                         |          | VP1 |    |    |    |    |    |     |     |     |     |     |     |     |     |     |     |     |     |     |     |     |     |     |     |     |     |     |     |     |     |     |     |     |     |     |     |     |     |     |     |     |   |
|-------------------------|----------|-----|----|----|----|----|----|-----|-----|-----|-----|-----|-----|-----|-----|-----|-----|-----|-----|-----|-----|-----|-----|-----|-----|-----|-----|-----|-----|-----|-----|-----|-----|-----|-----|-----|-----|-----|-----|-----|-----|-----|---|
| Strain                  | Country  | 21  | 54 | 73 | 89 | 90 | 94 | 104 | 107 | 108 | 141 | 146 | 148 | 150 | 239 | 308 | 345 | 393 | 411 | 444 | 456 | 511 | 515 | 532 | 576 | 579 | 595 | 596 | 630 | 687 | 688 | 700 | 718 | 748 | 751 | 766 | 775 | 851 | 859 | 872 | 877 | 879 |   |
| ■ 1/chicken/EGY/H792/23 | Egypt    | K   | L  | Y  | E  | G  | K  | Q   | F   | P   | I   | E   | L   | D   | A   | S   | H   | E   | T   | N   | F   | K   | D   | R   | T   | K   | C   | S   | G   | P   | E   | K   | N   | V   | K   | D   | T   | R   | I   | Q   | S   | Q   |   |
| ■ 1/chicken/EGY/H793/23 | Egypt    | K   | L  | Y  | E  | G  | K  | Q   | F   | P   | I   | E   | L   | D   | A   | S   | H   | E   | T   | N   | F   | K   | D   | R   | T   | K   | C   | S   | G   | P   | E   | K   | N   | V   | K   | D   | T   | R   | I   | Q   | S   | Q   |   |
| ■ 1/chicken/EGY/H798/23 | Egypt    | K   | L  | Y  | E  | G  | K  | Q   | F   | P   | I   | E   | L   | D   | A   | S   | H   | D   | T   | N   | F   | K   | D   | R   | T   | K   | C   | F   | S   | P   | E   | K   | N   | V   | K   | D   | T   | R   | I   | Q   | S   | Q   |   |
| ■ 1/chicken/EGY/H801/23 | Egypt    | K   | L  | Y  | E  | G  | K  | Q   | F   | P   | I   | E   | L   | D   | A   | S   | H   | E   | T   | N   | F   | K   | D   | R   | S   | K   | C   | F   | G   | P   | E   | K   | N   | V   | K   | D   | T   | R   | I   | R   | S   | P   |   |
| ■ 1/chicken/EGY/H812/23 | Egypt    | K   | L  | Y  | E  | G  | K  | Q   | F   | P   | I   | E   | L   | D   | A   | S   | H   | E   | T   | N   | F   | K   | D   | R   | T   | K   | C   | S   | G   | P   | E   | K   | N   | V   | K   | D   | T   | R   | I   | Q   | S   | P   |   |
| IBDV-CV98-2023          | Egypt    | K   | L  | Y  | E  | G  | K  | Q   | F   | S   | I   | E   | L   | D   | A   | S   | H   | E   | T   | N   | F   | K   | D   | R   | T   | K   | C   | S   | -   | -   | -   | -   | -   | -   | -   | -   | -   | -   | -   | -   | -   | -   | - |
| IBDV-EGY-CV75-2023      | Egypt    | K   | L  | Y  | E  | G  | K  | Q   | F   | P   | I   | E   | L   | D   | A   | S   | H   | E   | T   | N   | F   | K   | E   | R   | T   | K   | C   | S   | -   | -   | -   | -   | -   | -   | -   | -   | -   | -   | -   | -   | -   | -   | - |
| IBDV-EGY-F647-2023      | Egypt    | K   | L  | Y  | K  | R  | N  | Q   | I   | P   | I   | E   | L   | D   | A   | S   | H   | E   | T   | N   | F   | K   | D   | R   | T   | K   | C   | S   | -   | -   | -   | -   | -   | -   | -   | -   | -   | -   | -   | -   | -   | -   | - |
| IBDV-EGY-F649-9-2023    | Egypt    | K   | L  | Y  | E  | G  | K  | Q   | F   | P   | I   | E   | L   | D   | A   | S   | H   | E   | T   | N   | F   | K   | D   | R   | T   | K   | C   | S   | -   | -   | -   | -   | -   | -   | -   | -   | -   | -   | -   | -   | -   | -   | - |
| IBDV-F658-2023          | Egypt    | K   | L  | Y  | E  | G  | K  | Q   | F   | P   | I   | E   | L   | D   | A   | S   | H   | E   | T   | N   | F   | K   | D   | S   | T   | K   | C   | S   | -   | -   | -   | -   | -   | -   | -   | -   | -   | -   | -   | -   | -   | -   | - |
| LN-2020-2               | China    | K   | L  | Y  | E  | G  | K  | Q   | F   | P   | I   | E   | L   | D   | T   | S   | H   | E   | T   | N   | F   | K   | D   | R   | T   | K   | C   | S   | G   | P   | E   | K   | N   | V   | K   | D   | T   | R   | I   | Q   | N   | Q   |   |
| SHG352                  | China    | K   | L  | H  | E  | G  | K  | Q   | F   | P   | I   | E   | L   | D   | A   | S   | H   | E   | T   | N   | F   | R   | D   | R   | T   | K   | C   | S   | G   | P   | E   | K   | N   | V   | K   | D   | T   | R   | I   | Q   | S   | Q   |   |
| FJ2021                  | China    | K   | L  | Y  | E  | G  | K  | Q   | F   | P   | I   | E   | L   | D   | A   | S   | H   | E   | T   | N   | F   | K   | D   | R   | T   | K   | C   | S   | G   | P   | D   | K   | N   | V   | K   | D   | T   | R   | I   | Q   | S   | Q   |   |
| HB202201                | China    | K   | L  | Y  | E  | G  | K  | Q   | F   | P   | I   | E   | L   | D   | A   | G   | R   | E   | T   | N   | L   | K   | D   | R   | T   | K   | C   | S   | G   | P   | E   | K   | N   | V   | K   | D   | T   | R   | T   | Q   | S   | Q   |   |
| IBD/SD/LY/CN/01/2020    | China    | K   | L  | Y  | E  | G  | K  | Q   | F   | P   | I   | E   | L   | D   | A   | S   | H   | E   | T   | N   | F   | R   | D   | R   | T   | K   | C   | S   | G   | P   | E   | K   | N   | V   | K   | D   | T   | R   | T   | Q   | S   | Q   |   |
| QZ191002                | China    | K   | L  | Y  | E  | G  | K  | H   | F   | P   | I   | E   | L   | D   | A   | S   | H   | E   | T   | D   | F   | R   | D   | R   | T   | K   | S   | S   | G   | S   | E   | R   | N   | V   | K   | D   | T   | R   | T   | Q   | S   | Q   |   |
| SHG358                  | China    | K   | L  | Y  | E  | G  | K  | Q   | F   | P   | I   | V   | L   | D   | A   | S   | H   | E   | A   | N   | F   | R   | D   | R   | T   | K   | C   | S   | G   | S   | E   | K   | N   | V   | K   | D   | T   | K   | T   | Q   | S   | Q   |   |
| ZD-2018-1               | China    | K   | L  | Y  | E  | G  | K  | Q   | F   | P   | I   | E   | I   | H   | A   | S   | H   | E   | T   | N   | F   | R   | D   | R   | T   | K   | C   | S   | G   | S   | E   | K   | N   | V   | R   | D   | T   | R   | T   | Q   | S   | Q   |   |
| UPM1432/2019            | Malaysia | R   | L  | Y  | E  | G  | K  | Q   | F   | P   | I   | E   | L   | D   | A   | S   | H   | E   | T   | N   | F   | R   | D   | R   | T   | K   | S   | S   | G   | S   | E   | K   | N   | V   | K   | D   | T   | R   | I   | Q   | S   | Q   |   |
| IBD16Hen01              | China    | K   | L  | Y  | E  | G  | K  | Q   | F   | P   | I   | E   | L   | D   | A   | S   | H   | E   | T   | N   | F   | R   | D   | R   | T   | K   | C   | S   | G   | S   | E   | K   | N   | V   | K   | D   | T   | R   | T   | Q   | S   | Q   |   |
| SHG19                   | China    | K   | L  | Y  | E  | G  | K  | Q   | F   | P   | I   | E   | L   | D   | A   | S   | H   | E   | T   | N   | F   | R   | D   | R   | T   | K   | C   | S   | G   | S   | E   | K   | N   | V   | K   | D   | T   | R   | T   | Q   | S   | Q   |   |
| HB-2020-1               | China    | K   | L  | Y  | E  | G  | K  | Q   | F   | P   | I   | E   | L   | D   | A   | S   | H   | E   | T   | N   | F   | R   | D   | R   | T   | K   | C   | S   | G   | S   | E   | K   | Y   | V   | K   | D   | T   | R   | T   | Q   | S   | Q   |   |
| GD-2                    | China    | K   | L  | Y  | E  | G  | K  | Q   | F   | P   | I   | E   | L   | D   | A   | S   | H   | E   | T   | N   | F   | R   | D   | R   | T   | K   | C   | S   | G   | S   | E   | K   | N   | V   | K   | D   | T   | R   | T   | Q   | S   | Q   |   |
| Hb06v                   | China    | K   | F  | Y  | E  | G  | K  | Q   | F   | P   | I   | E   | L   | D   | A   | S   | H   | E   | T   | N   | F   | R   | D   | R   | T   | K   | C   | S   | G   | S   | E   | K   | N   | I   | K   | D   | A   | R   | T   | Q   | S   | Q   |   |
| GD2021-17               | China    | K   | L  | Y  | E  | G  | K  | Q   | F   | P   | I   | E   | L   | D   | A   | S   | H   | E   | T   | N   | F   | R   | D   | R   | T   | K   | C   | S   | G   | S   | E   | K   | N   | V   | K   | N   | T   | R   | T   | Q   | S   | Q   |   |
| LN-2020-1               | China    | K   | L  | Y  | E  | G  | K  | Q   | F   | P   | I   | E   | L   | D   | A   | S   | H   | E   | T   | N   | F   | R   | D   | R   | T   | K   | C   | S   | G   | S   | E   | K   | N   | V   | K   | D   | T   | R   | T   | Q   | S   | Q   |   |
| FJ2019                  | China    | K   | L  | Y  | E  | G  | K  | Q   | F   | P   | V   | E   | L   | D   | A   | S   | H   | E   | T   | N   | F   | R   | D   | R   | T   | R   | C   | S   | G   | S   | E   | K   | N   | V   | K   | D   | T   | R   | T   | Q   | S   | Q   |   |
